# Supplementary material for: Direct Z-Scheme Heterojunction Catalysts Constructed by Graphitic-C3N4 and Photosensitive Metal-Organic Cages for Efficient Photocatalytic Hydrogen Evolution
Source: MDPI journal article supplement (doi:10.3390/nano12050890), 2022-03-07
Supplement: s1 [file s1]

Article

# Direct Z-Scheme Heterojunction Catalysts Constructed by Graphitic-C<sub>3</sub>N<sub>4</sub> and Photosensitive Metal-Organic Cages for Efficient Photocatalytic Hydrogen Evolution

Chuying Lv <sup>1</sup>, Su Qin <sup>2</sup>, Yang Lei <sup>1</sup>, Xinao Li <sup>1</sup>, Jianfeng Huang <sup>1,\*</sup> and Junmin Liu <sup>1,\*</sup>

<sup>1</sup> School of Materials Science and Engineering, The Key Laboratory of Low-Carbon Chemistry & Energy Conservation of Guangdong Province, Sun Yat-sen University, Guangzhou 510006, China; lvchy3@mail2.sysu.edu.cn (C.L.); leiy56@mail2.sysu.edu.cn (Y.L.); lixao@mail2.sysu.edu.cn (X.L.)

<sup>2</sup> School of Chemical Engineering and New Energy Materials, Zhuhai College of Science and Technology, Zhuhai 519041, China; qins3@mail2.sysu.edu.cn

\* Correspondence: huangjf39@mail.sysu.edu.cn (J.H.); liujunm@mail.sysu.edu.cn (J.L.)

**Table S1.** The measured mass fractions of Pd and MOC-Q2 in g-C<sub>3</sub>N<sub>4</sub>/MOC-Q2 (0.3/0.7/1.0/2.0 wt%) catalysts.

| Theoretical MOC-Q2 loading / wt% | Actual Pd loading / wt% | Actual MOC-Q2 loading / wt% |
|----------------------------------|-------------------------|-----------------------------|
| 0.3                              | 0.01                    | 0.24                        |
| 0.7                              | 0.03                    | 0.53                        |
| 1                                | 0.05                    | 0.80                        |
| 2                                | 0.10                    | 1.65                        |

Mw (MOC-Q2) = 3452.82 and Mw (Pd) = 106.42; MOC-Q2 wt% = Pd wt% / (212.84/3458.82).

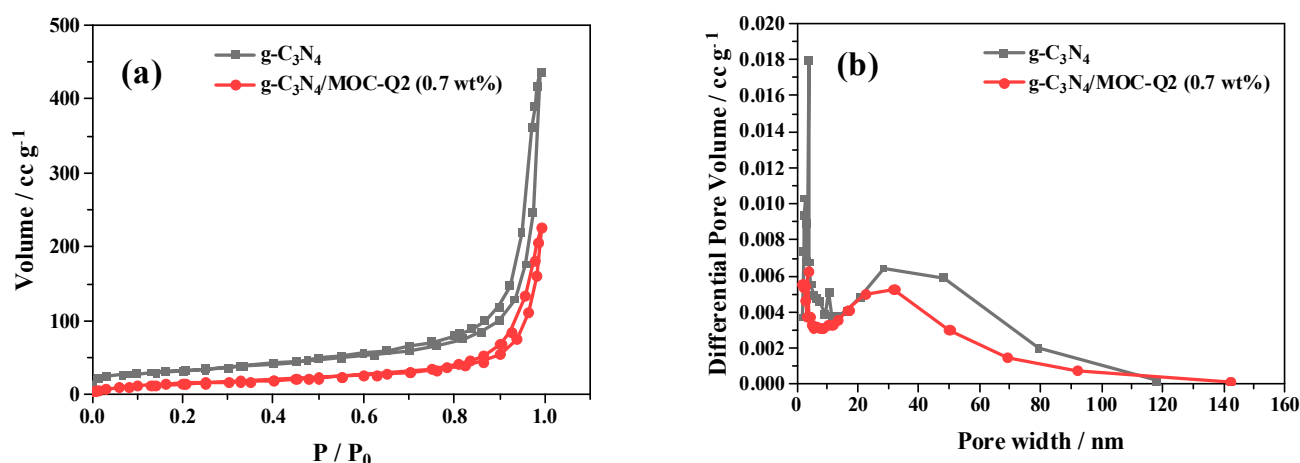

**Figure S1.** (a) N<sub>2</sub> adsorption-desorption isotherms and (b) pore size distributions of g-C<sub>3</sub>N<sub>4</sub> and g-C<sub>3</sub>N<sub>4</sub>/MOC-Q2 (0.7 wt%).

**Table S2.** BET surface areas and pore volumes of g-C<sub>3</sub>N<sub>4</sub> and g-C<sub>3</sub>N<sub>4</sub>/MOC-Q2 (0.7 wt%).

|                                              | g-C <sub>3</sub> N <sub>4</sub> | g-C <sub>3</sub> N <sub>4</sub> /MOC-Q2 (0.7 wt%) |
|----------------------------------------------|---------------------------------|---------------------------------------------------|
| BET surface area (m <sup>2</sup> /g)         | 94.6                            | 54.5                                              |
| Total pore volume (cm <sup>3</sup> /g)       | 0.47                            | 0.33                                              |
| Microporous pore volume (cm <sup>3</sup> /g) | 0.008                           | —                                                 |
| Mesoporous pore volume (cm <sup>3</sup> /g)  | 0.47                            | 0.33                                              |

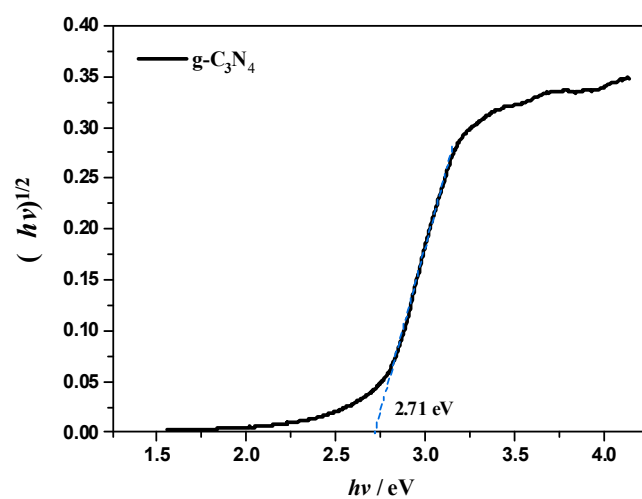

**Figure S2.** Tauc plot of the g-C<sub>3</sub>N<sub>4</sub> sample.

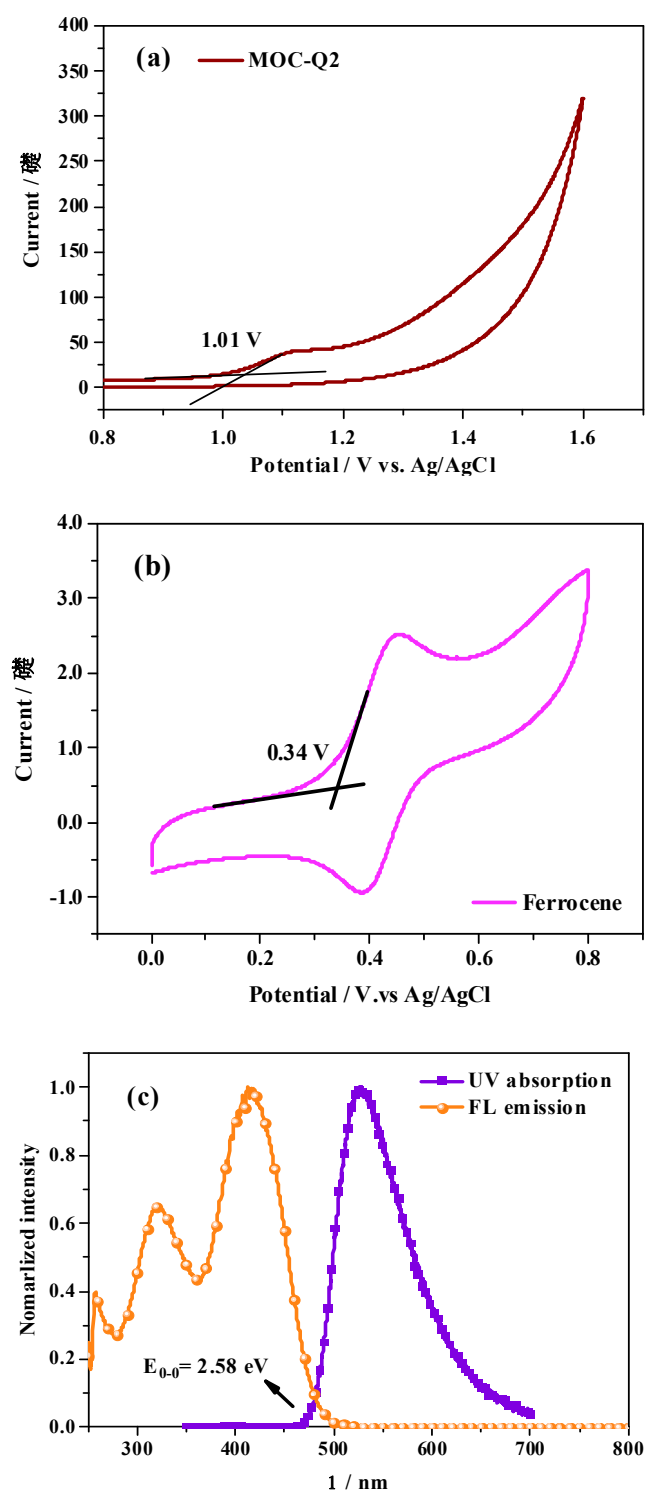

**Figure S3.** CV curves of (a) MOC-Q2 (0.1 mM) and (b) ferrocene in a mixed solvent of DMSO/CH<sub>3</sub>CN (1:5 v/v) containing (C<sub>4</sub>H<sub>9</sub>)<sub>4</sub>NPF<sub>6</sub> with a scan rate of 50 mV s<sup>-1</sup>, and (c) normalized absorption and emission spectra of MOC-Q2.

**Table S3.** The oxidation potential, E<sub>0-0</sub>, HOMO, and LUMO values of MOC-Q2.

| Compound | E <sub>ox</sub> /V vs. Ag/AgCl | E <sub>ox</sub> /V vs. NHE | E <sub>0-0</sub> /eV | HOMO/V vs. NHE | LUMO/V vs. NHE |
|----------|--------------------------------|----------------------------|----------------------|----------------|----------------|
| MOC-Q2   | 1.01                           | 0.97                       | 2.58                 | 0.97           | -1.61          |

**Table S4.** Summary of the H<sub>2</sub> production amounts and the corresponding TONs within 5 h.

| Material                                          | H <sub>2</sub> yield/mmol/g <sup>[a]</sup> | TON <sub>[Pd]</sub> <sup>[b]</sup> | TON <sub>[MOC]</sub> <sup>[c]</sup> |
|---------------------------------------------------|--------------------------------------------|------------------------------------|-------------------------------------|
| MOC-Q2                                            | 4.28                                       | 7                                  | 15                                  |
| Pd/g-C <sub>3</sub> N <sub>4</sub> /L-2 (0.7 wt%) | 0.78                                       | 255                                | –                                   |
| g-C <sub>3</sub> N <sub>4</sub> /MOC-Q2 (0.3 wt%) | 13.47                                      | 9706                               | 19,413                              |
| g-C <sub>3</sub> N <sub>4</sub> /MOC-Q2 (0.7 wt%) | 32.11                                      | 10,478                             | 20,955                              |
| g-C <sub>3</sub> N <sub>4</sub> /MOC-Q2 (1.0 wt%) | 15.76                                      | 3407                               | 6814                                |
| g-C <sub>3</sub> N <sub>4</sub> /MOC-Q2 (2.0 wt%) | 14.76                                      | 1547                               | 3094                                |

[a] = H<sub>2</sub> yield in 5 h / total mass of catalysts; [b] = H<sub>2</sub> yield vs. Pd loading amount = [a] × 0.001 × 106.42<sup>[d]</sup> / corresponding Pd loading mass fraction; [c] = H<sub>2</sub> yield vs. MOC loading amount = [a] × 0.001 × 3458.82<sup>[e]</sup> / corresponding MOC loading mass fraction; [d]: Relative molecular mass of Pd; [e]: Relative molecular mass of MOC-Q2

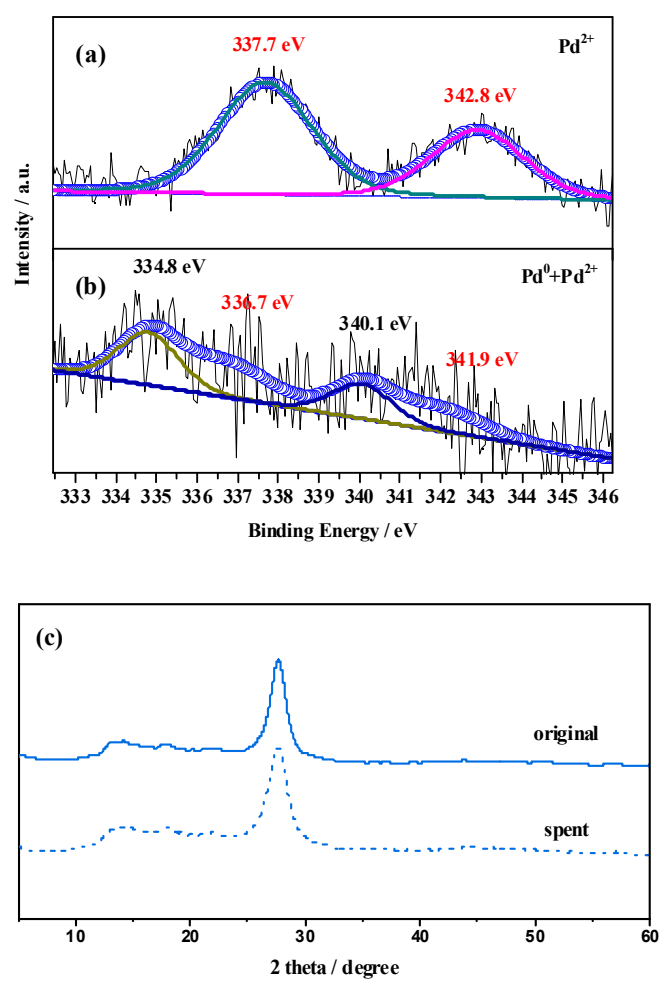**Figure S4.** The XPS Pd 3d spectra of g-C<sub>3</sub>N<sub>4</sub>/MOC-Q2 (2 wt%) (a) before and (b) after 10 h photocatalysis, and (c) the XRD patterns of g-C<sub>3</sub>N<sub>4</sub>/MOC-Q2 (2 wt%) samples before and after photocatalytic reaction.

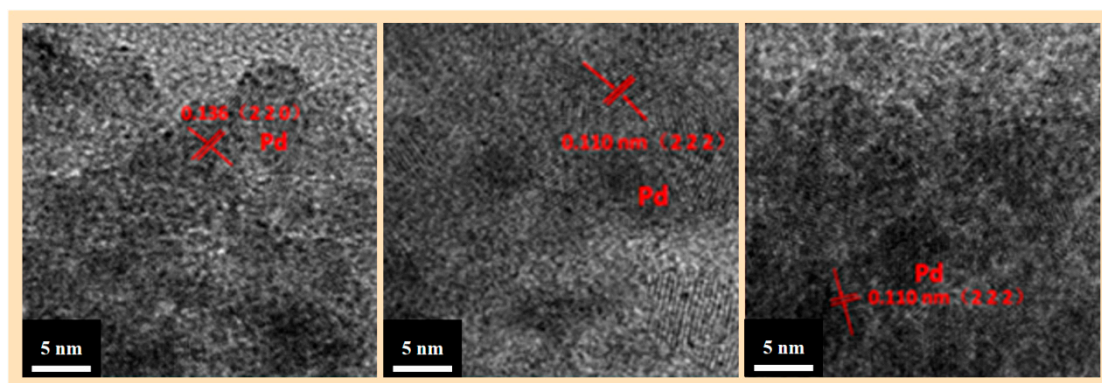

**Figure S5.** High-resolution TEM images of the spent g-C<sub>3</sub>N<sub>4</sub>/MOC-Q2 (2 wt%) sample after photocatalytic reaction.

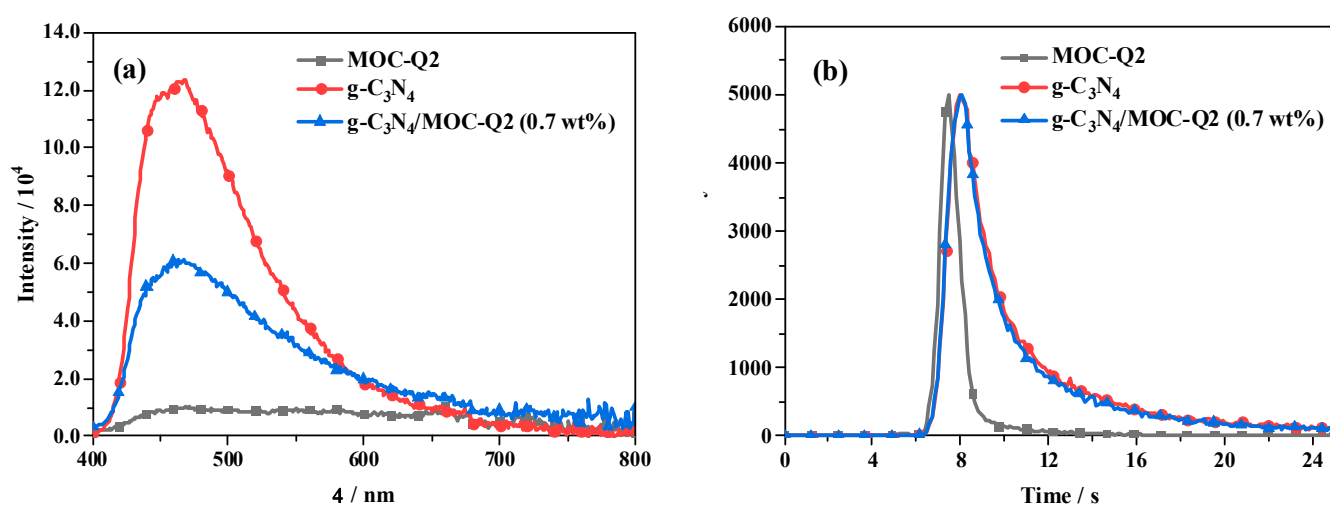

**Figure S6.** (a) Steady state and (b) time-resolved PL spectra of MOC-Q2, g-C<sub>3</sub>N<sub>4</sub>, and g-C<sub>3</sub>N<sub>4</sub>/MOC-Q2 (0.7 wt%).
